# Supplementary material for: The Novel Small Molecule BTB Inhibits Pro-Fibrotic Fibroblast Behavior though Inhibition of RhoA Activity
Source: MDPI journal article supplement (doi:10.3390/ijms231911946), 2022-10-08
Supplement: s1 [file s1]

## BTB Paper Supplemental Figures

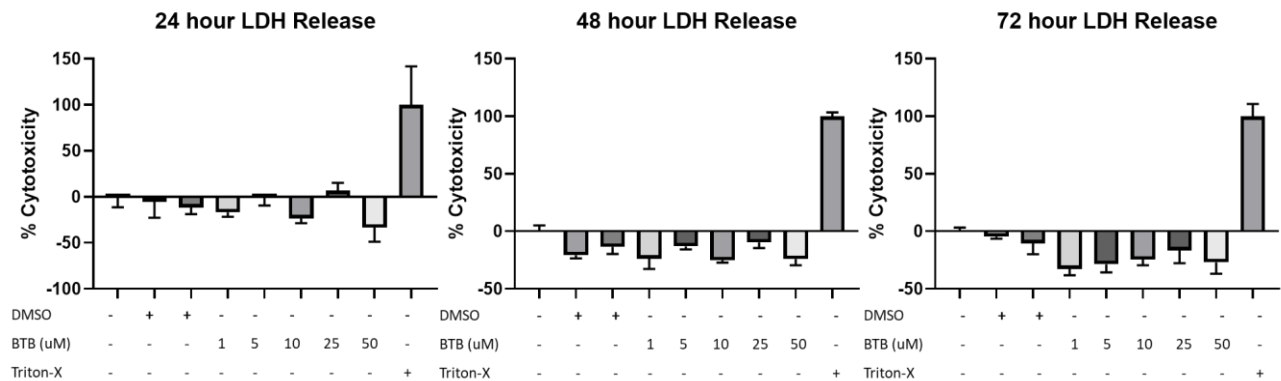

**Supplemental Figure S1 (SF1). BTB Does Not Induce Cell Death Over 72 hours.** Fibroblasts were cultured on 96 well plates for 72 hours. Media was removed every 24 hours for 72 hours (the cumulative removed media volume never exceeded 10% of the total well volume) and assayed for LDH content.

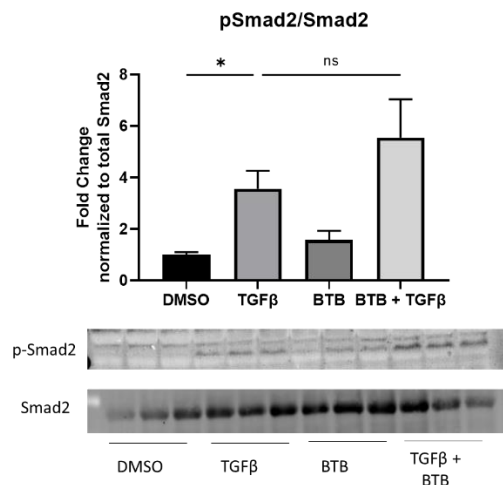

**Supplemental Figure S2 (SF2). BTB Does Not Inhibit Smad2 Phosphorylation.** Fibroblasts were treated with 1 ng/mL TGFβ and/or 50 μM BTB for 60 minutes before protein was harvested to examine Smad2 phosphorylation. Data was analyzed by ANOVA, n=3/group, \*=P<.05.

## Supplemental Table S1. Primary Antibodies.

| Antibody                      | Company                   | Catalogue Number |
|-------------------------------|---------------------------|------------------|
| AIF                           | Cell Signaling Technology | 4642             |
| Alpha smooth muscle actin-Cy3 | Sigma                     | C6198            |
| Beta-tubulin-Cy3              | Abcam                     | Ab11309          |

|             |                           |             |
|-------------|---------------------------|-------------|
| Calponin    | Abcam                     | Ab46794     |
| Cofilin     | Cell Signaling Technology | 5175S       |
| Cofilin     | Santa Cruz                | SC-376476   |
| Collagen 1  | Aviva                     | ARP59999    |
| DAAM1       | Santa Cruz                | SC-100942   |
| Fibronectin | Abcam                     | Ab6328      |
| Gβ          | Santa Cruz                | SC-166123   |
| Histone H3  | Cell Signaling Technology | 9715        |
| HSP90       | Cell Signaling Technology | 4874        |
| Lamin A/C   | Cell Signaling Technology | 4777        |
| mDia        | Thermo Fisher Scientific  | 20624-1-AP  |
| p-cofilin   | Cell Signaling Technology | 3313S       |
| Profilin    | Santa Cruz                | SC-137235   |
| pSmad2      | Abcam                     | 188334      |
| RhoA        | Cell Signaling Technology | 2117S       |
| ROCK1       | Abcam                     | EPR638Y     |
| Smad2       | Cell Signaling Technology | 3103S       |
| TDAG8       | Sigma                     | SAB29000463 |
